# Supplementary material for: X-ray and neutron diffraction studies of flux and hydrothermally grown nonlinear optical material KBe2BO3F2
Source: Royal Society of Chemistry journal article supplement (doi:10.1039/c2ce25828e), 2012-01-01
Supplement: c2ce25828e.pdf [file c2ce25828e.pdf]

## Supplement

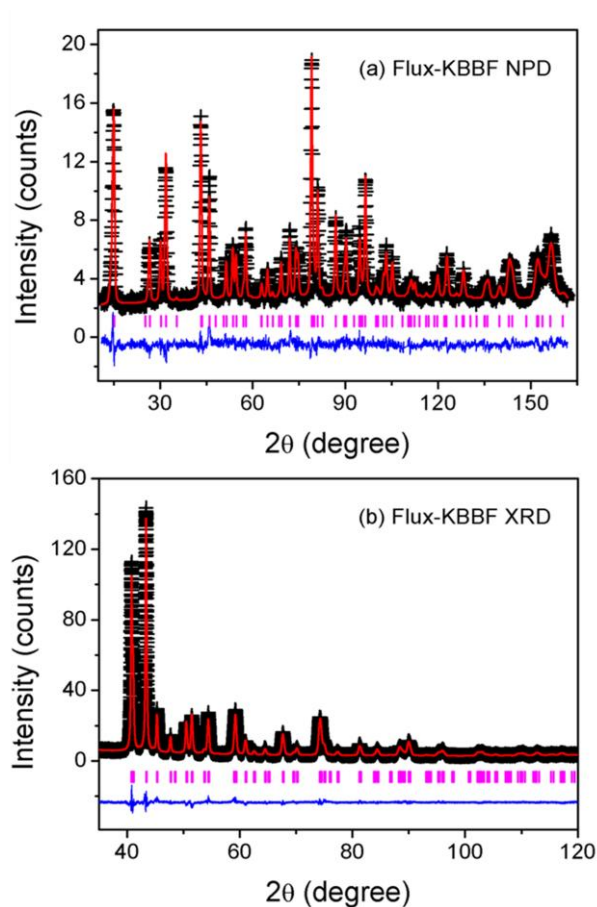

Figure S1. Combined Rietveld analysis of NPD (a) and XRD (b) for flux-KBBF powder. Plus (+) marks represent the experimental results and the solid line is from refinement. The ticks indicate the expected positions for structure *R32*. The difference between experimental and calculated results is shown beneath.

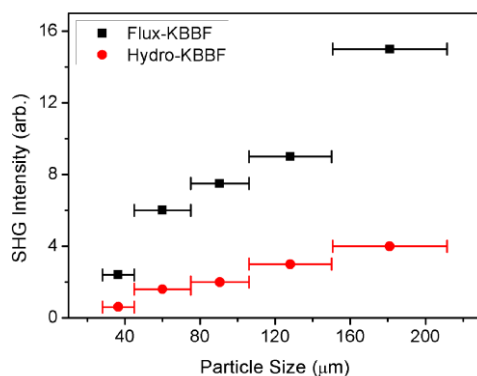

Figure S2. Powder SHG intensities of flux-KBBF and hydro-KBBF

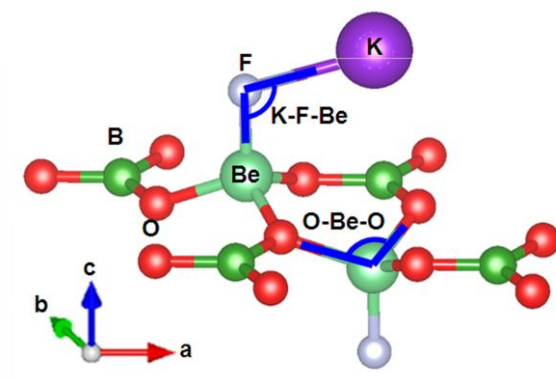

Figure S3. The sketch of the geometric relation between bonds and angles in layer  $(\text{Be}_2\text{BO}_3\text{F}_2)_\infty$
